# Supplementary material
Source: PubMed Central journal article supplement (PMC5367885)
Supplement: NIHMS797221-supplement-Supplemental.pdf [file NIHMS797221-supplement-Supplemental.pdf]

# Supplementary information

**Application of bacterial cytological profiling to crude natural product extracts reveals the antibacterial arsenal of *Bacillus subtilis***

Poochit Nonejuie<sup>a\*</sup>, Rachelle M. Trial<sup>a\*</sup>, Gerald L. Newton<sup>a</sup>, Anne Lamsa<sup>a</sup>, Varahenage Ranmali Perera<sup>a</sup>, Julieta Aguilar<sup>a</sup>, Wei-Ting Liu<sup>b</sup>, Pieter C. Dorrestein<sup>b, c</sup>, Joe Pogliano<sup>a</sup> and Kit Pogliano<sup>a\*\*</sup>

<sup>a</sup> Division of Biological Sciences, University of California, San Diego

<sup>b</sup> Skaggs School of Pharmacy and Pharmaceutical Sciences, University of California, San Diego

<sup>c</sup> Center for Marine Biotechnology and Biomedicine, University of California, San Diego

\*Indicates shared first author

\*\*To whom correspondence should be directed: E-mail: [kpogliano@ucsd.edu](mailto:kpogliano@ucsd.edu). Phone: (858) 822-1314 Mailing address: Natural Sciences Building 4113, 9500 Gilman Drive, La Jolla, CA 92093-0377

## Supplementary figures

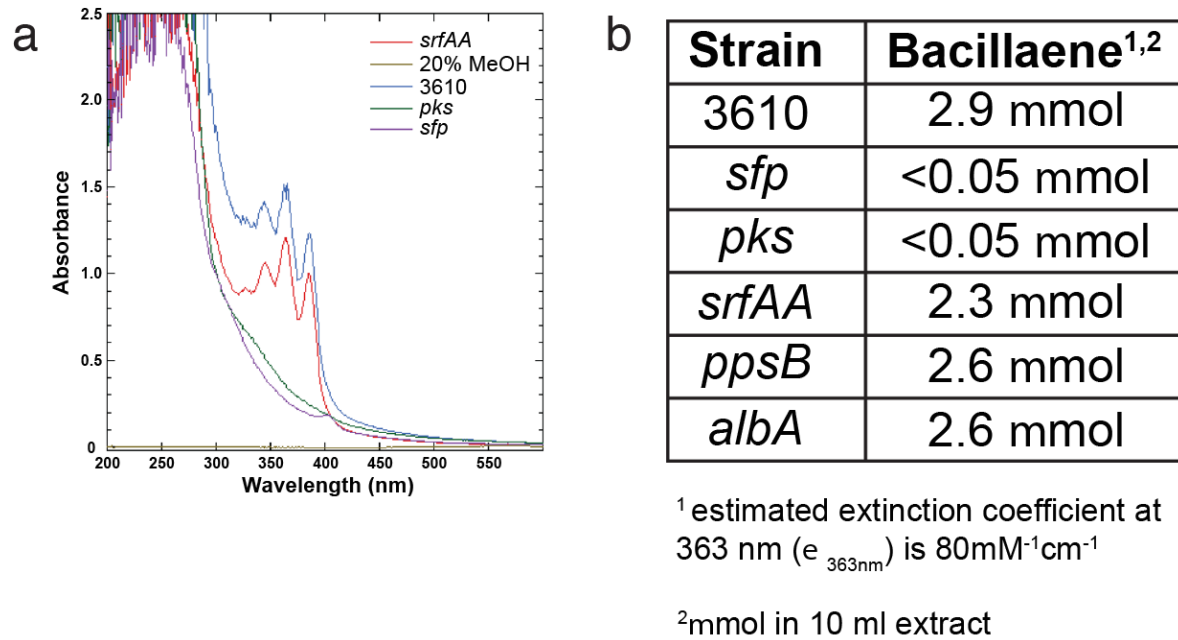

**Figure S1 Bacillaene signature spectrum and amount found in each extract**

(a) Absorption spectrum of *B. subtilis* ethanolic crude extracts assayed for bacillaene (b)

Estimated bacillaene content in each crude extract based on 363 nm absorbance

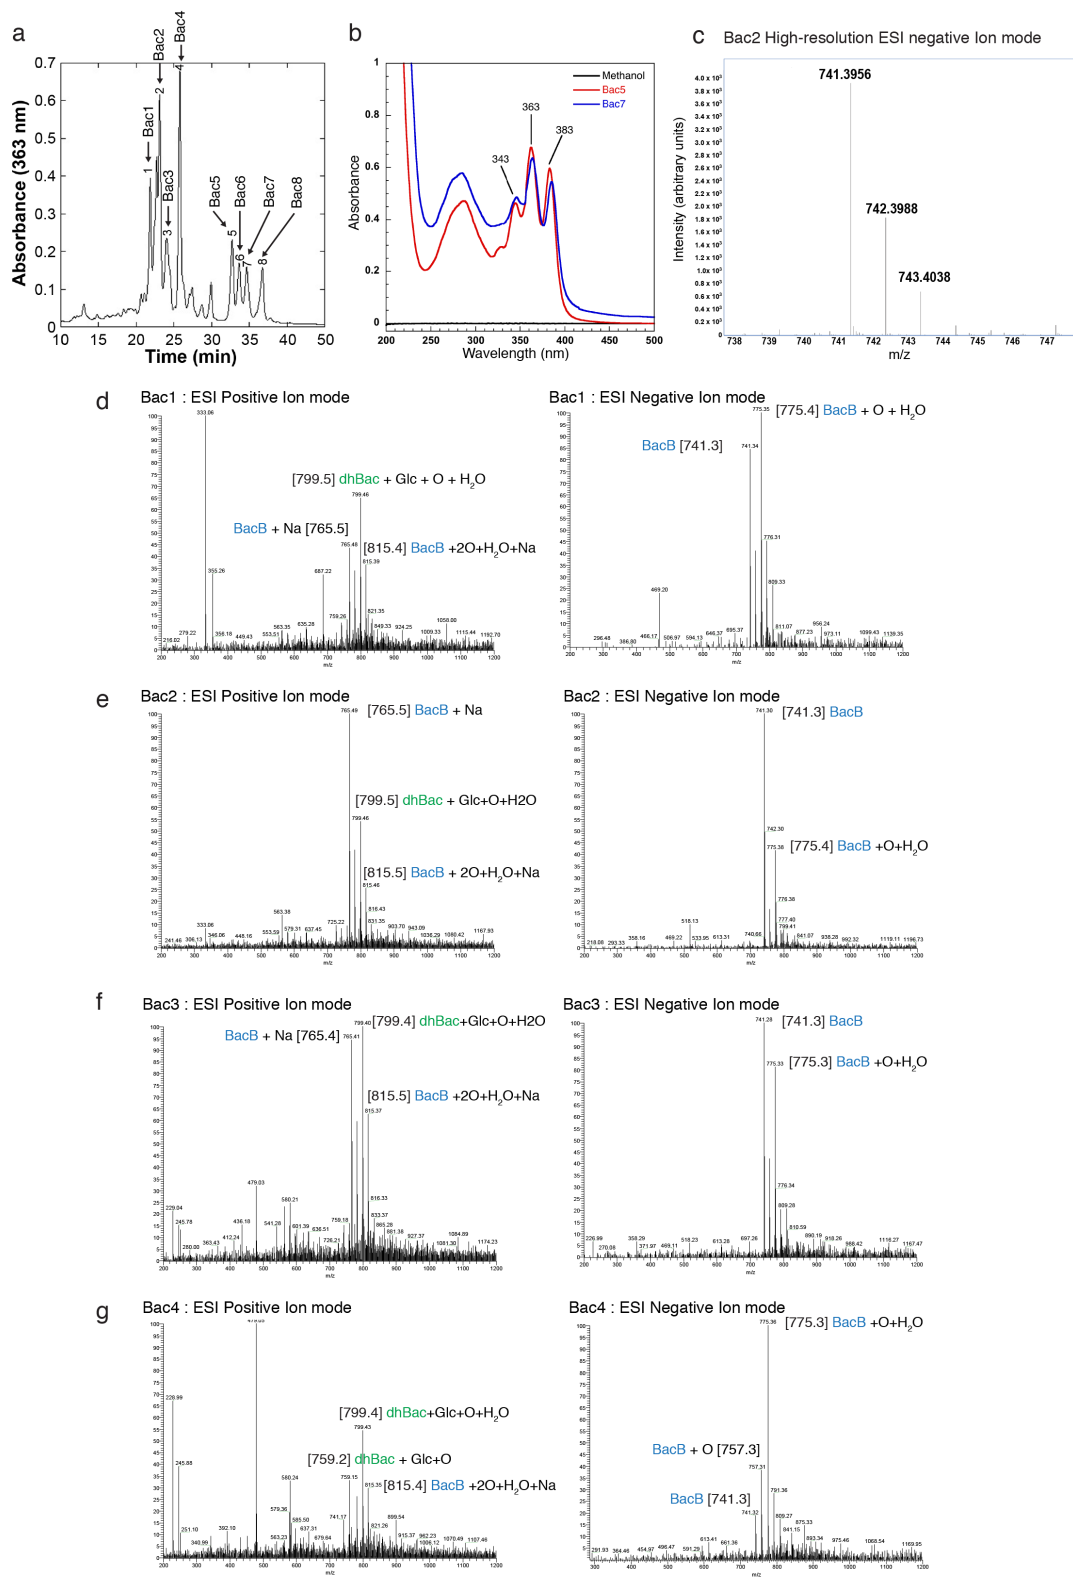

Figure S2

**Figure S2 Bacillaene B dominated other bacillaene species in the early HPLC**

**fractions (Bac1-Bac4 fractions)** (a) HPLC separation of bacillaenes from *srfAA*

SepPak fraction 5 showing 8 different major peaks (Bac1-Bac8) (b) Absorption spectrum

of HPLC purified bacillaene fraction 5 and fraction 7 (c) High-resolution ESI-MS

analysis in the negative ion mode of bacillaene fraction 2 (d) ESI-MS analysis in the

positive (left) and negative (right) ion mode of fraction 1 from the bacillaene purification

(e) ESI-MS analysis in the positive (left) and negative (right) ion mode of fraction 2 from

the bacillaene purification (f) ESI-MS analysis in the positive (left) and negative (right)

ion mode of fraction 3 from the bacillaene purification (g) ESI-MS analysis in the positive

(left) and negative (right) ion mode of fraction 4 from the bacillaene purification

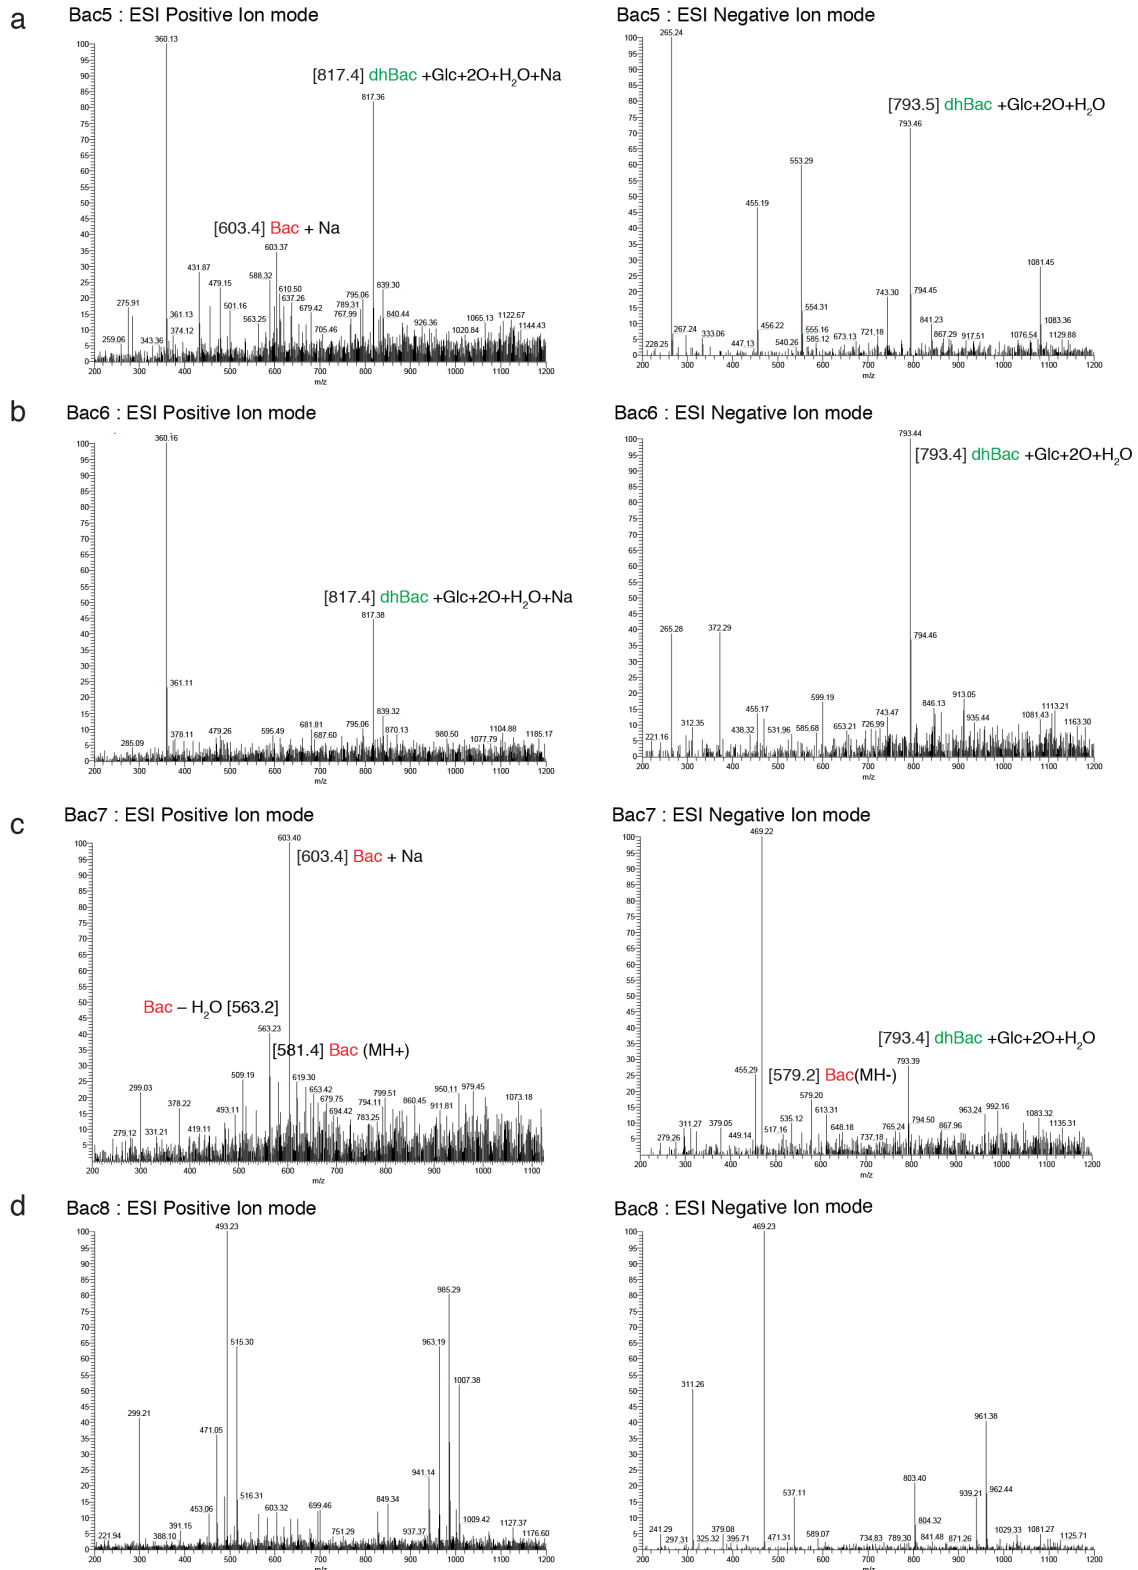

Figure S3

**Figure S3 Bacillaene found in the later fractions of HPLC (Bac5 and Bac7)**

(a) ESI-MS analysis in the positive (left) and negative (right) ion mode of fraction 5 from the bacillaene purification (b) ESI-MS analysis in the positive (left) and negative (right) ion mode of fraction 6 from the bacillaene purification (c) ESI-MS analysis in the positive (left) and negative (right) ion mode of fraction 7 from the bacillaene purification (d) ESI-MS analysis in the positive (left) and negative (right) ion mode of fraction 8 from the bacillaene purification

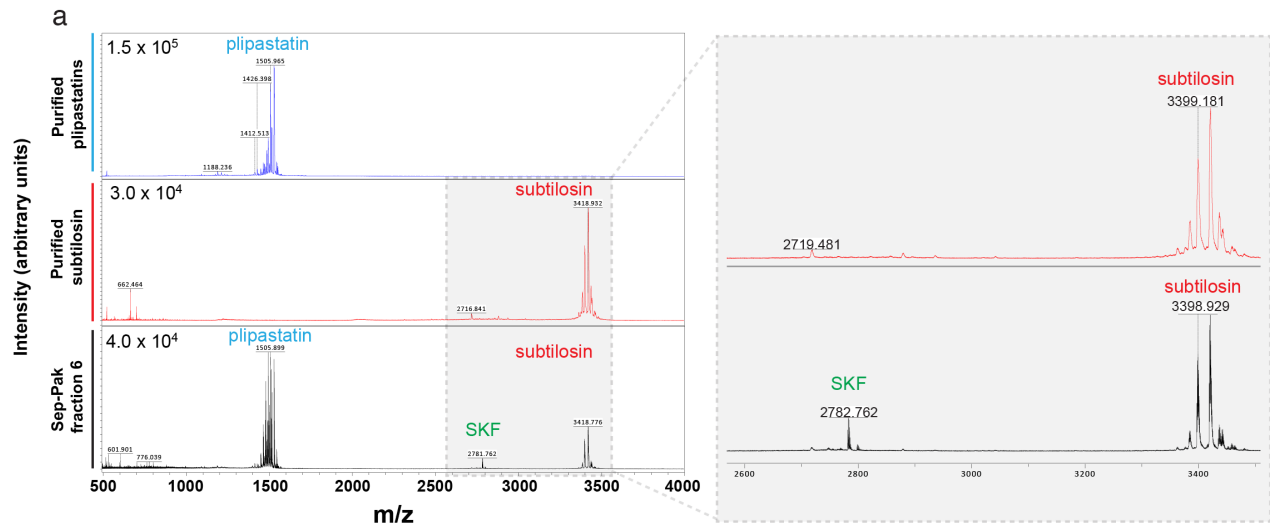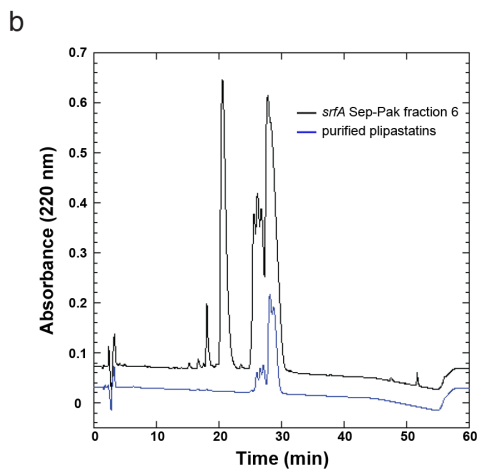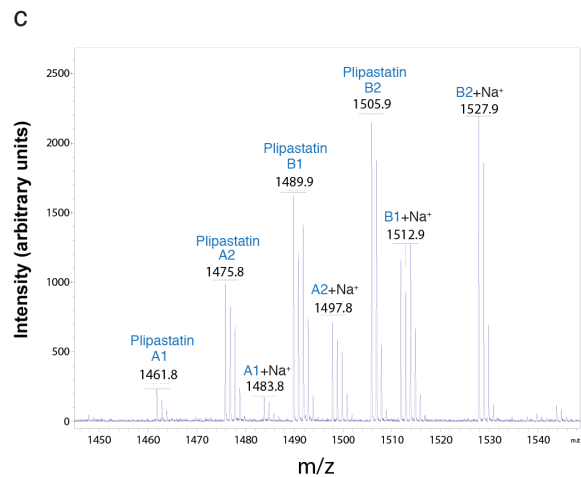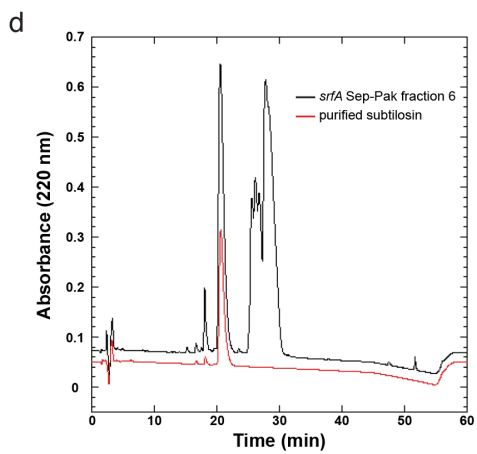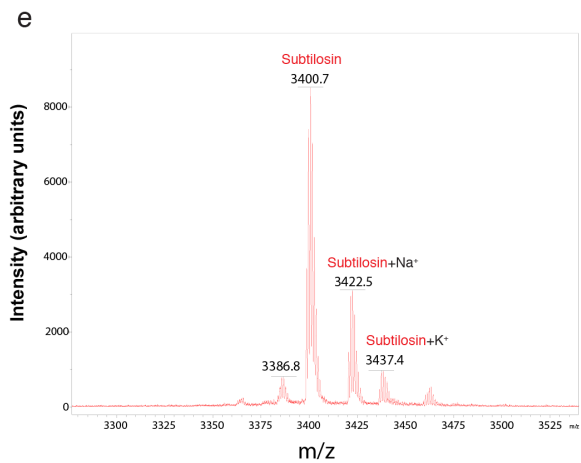

**Figure S4**

#### **Figure S4 Plipastatin and subtilosin purification**

(a) MALDI mass spectrometry analysis (positive mode) of purified plipastatins, purified subtilosin from *B. subtilis srfAA* SepPak fraction 6 (b) HPLC purification of plipastatins from *B. subtilis srfAA* SepPak fraction 6.(c) MALDI-TOF mass spectrometry analysis (positive mode) of HPLC purified and reconstituted *B. subtilis* plipastatins A1, A2, B1 and B2 (d) HPLC purification of subtilosin from *B. subtilis srfAA* SepPak fraction 6. (e) MALDI-TOF mass spectrometry analysis (positive mode) of HPLC purified subtilosin



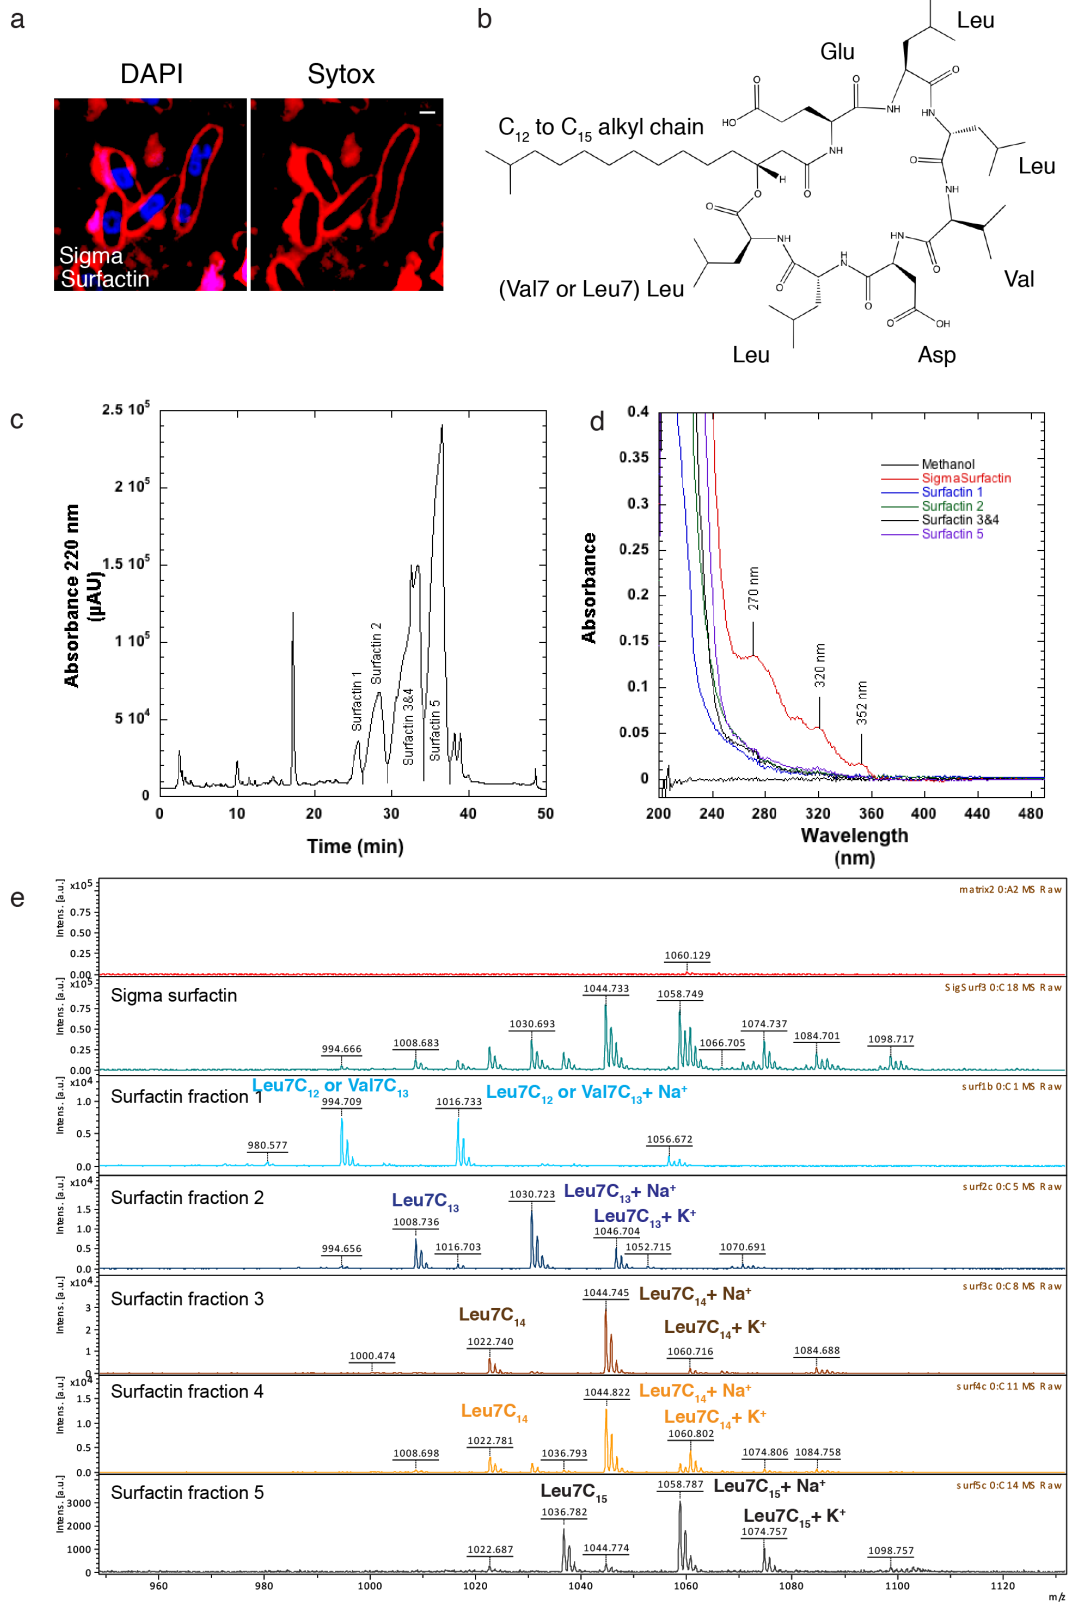

Figure S5

### Figure S5 Surfactin purification

(a) *E. coli* cells treated for 2 hours with Sigma commercial surfactin 576 $\mu$ M. *E. coli* cells were stained with FM4-64 (Red), DAPI (Blue) and SYTOX-Green (Green). Scale bar, 1  $\mu$ m. (b) Surfactin chemical structure and annotation (c) HPLC purification of commercial *B. subtilis* surfactin (Sigma S3523) (d) UV-Visible absorption spectrum of commercial surfactin and HPLC purified surfactins assayed for bacillaene contamination. (e) MALDI-TOF mass spectrometry analysis (positive mode) of commercial surfactin and HPLC purified surfactin fractions.

## Supplementary tables

Table S1 Strains used in this study

| Strains                         | Genotype                     | References                      |
|---------------------------------|------------------------------|---------------------------------|
| <b><i>Bacillus subtilis</i></b> |                              |                                 |
| 3610                            | undomesticated parent of 168 | Previous study <sup>1</sup>     |
| PSK0178                         | $\Delta pks::spc$            | Previous study <sup>2</sup>     |
| PSK0060                         | <i>srfAA::mls</i>            | Previous study <sup>3</sup>     |
| PSK0417                         | $\Delta albA::kan$           | Previous study <sup>4</sup>     |
| EG220-1                         | <i>sfp::mls</i>              | Previous studies <sup>1,3</sup> |
| PSK0156                         | <i>ppsB::spc</i>             | Previous study <sup>3</sup>     |
| <b><i>Escherichia coli</i></b>  |                              |                                 |
| NR698                           | <i>lptD4213</i>              | Previous study <sup>5</sup>     |

**Table S2.** Bacillaene fractions from HPLC of *srfAA* SepPak 5

| Fraction<br>(% of Total Bacillaenes) | Bacillaene<br>concentration ( $\mu\text{M}$ )<br>Assumes<br>$E_{363} \sim 80 \text{ mM}^{-1}$ | Killing<br>activity* | Minimal Cytological<br>Concentration ( $\mu\text{M}$ ) |
|--------------------------------------|-----------------------------------------------------------------------------------------------|----------------------|--------------------------------------------------------|
| Fraction 1 : Bac1<br>(9.5%)          | 300                                                                                           | -                    | NA                                                     |
| Fraction 2 : Bac2<br>(26%)           | 353                                                                                           | +                    | 20                                                     |
| Fraction 3 : Bac3<br>(11%)           | 188                                                                                           | -                    | NA                                                     |
| Fraction 4 : Bac4<br>(18%)           | 158                                                                                           | -                    | NA                                                     |
| Fraction 5 : Bac5<br>(7%)            | 61                                                                                            | -                    | NA                                                     |
| Fraction 6 : Bac6<br>(6%)            | 74                                                                                            | -                    | NA                                                     |
| Fraction 7 : Bac7<br>(6%)            | 68                                                                                            | +                    | 2                                                      |
| Fraction 8 : Bac8<br>(6%)            | 44                                                                                            | -                    | NA                                                     |

\* Determined based on killing spot test

**Table S3 Minimal inhibitory concentration of purified natural products from *B. subtilis***

| <b>Molecules</b> | <b>Minimal inhibitory concentration<br/>(<math>\mu\text{M}</math>)</b> |
|------------------|------------------------------------------------------------------------|
| Bacillaene       | NA                                                                     |
| Bacillaene B     | NA                                                                     |
| Plipastatin      | >128                                                                   |
| Subtilosin       | 8                                                                      |
| Surfactin        | >512                                                                   |
| SKF              | NA                                                                     |

### **Supplementary references**

1. Branda, S. S., González-Pastor, J. E., Ben-Yehuda, S., Losick, R. & Kolter, R. Fruiting body formation by *Bacillus subtilis*. *Proc. Natl. Acad. Sci.* **98**, 11621–11626 (2001).
2. Straight, P. D., Fischbach, M. A., Walsh, C. T., Rudner, D. Z. & Kolter, R. A singular enzymatic megacomplex from *Bacillus subtilis*. *Proc. Natl. Acad. Sci.* **104**, 305–310 (2007).
3. Straight, P. D., Willey, J. M. & Kolter, R. Interactions between *Streptomyces coelicolor* and *Bacillus subtilis*: Role of Surfactants in Raising Aerial Structures. *J. Bacteriol.* **188**, 4918–4925 (2006).
4. Butcher, R. A. *et al.* The identification of bacillaene, the product of the PksX megacomplex in *Bacillus subtilis*. *Proc. Natl. Acad. Sci.* **104**, 1506–1509 (2007).
5. Ruiz, N., Falcone, B., Kahne, D. & Silhavy, T. J. Chemical Conditionality: A Genetic Strategy to Probe Organelle Assembly. *Cell* **121**, 307–317 (2005).
